# Supplementary material for: Switching the basicity of ionic liquids by CO2
Source: Royal Society of Chemistry journal article supplement (doi:10.1039/b811624e), 2008-01-01
Supplement: b811624e.pdf [file b811624e.pdf]

## Switching the basicity of ionic liquids by CO<sub>2</sub>

Wenjing Li, Zhaofu Zhang, Buxing Han\*, Suqin Hu, Jinliang Song, Ye Xie and Xiaosi Zhou

Beijing National Laboratory for Molecular Sciences, Institute of Chemistry, Chinese Academy of Sciences, Beijing 100080, PR China

\*Fax: 86-10-62559373; Tel: 86-10-62562821; E-mail: [hanbx@iccas.ac.cn](mailto:hanbx@iccas.ac.cn)

### Supporting Information

#### Experimental

**Materials** The indicators, 4-Nitrobenzylcyanide (Acros Organics) and 2,5-dinitrophenol (Merk) were used as received. N-methylimidazole and potassium tetrafluoroborate were purchased from Acros Organics. 1,1,3,3-tetramethylguanidine, perchloric acid, choline chloride, urea and all organic solvents were A.R. grade and supplied by Beijing Chemical Reagents Company. 2-Bromoethylamine hydrobromide was a product of Shanghai Nanxiang Reagent Co., Ltd. N-methylimidazole and 1,1,3,3-tetramethylguanidine were redistilled before use. Solvents were dried over 3 Å molecular sieves.

**Preparation of ILs** All used ionic liquids were synthesized following procedures reported in the literature.<sup>S1-S4</sup> [TMG][ClO<sub>4</sub>] was prepared by neutralizing 1,1,3,3-tetramethylguanidine and perchloric acid in ethanol.<sup>S1</sup> CH/urea was prepared simply by heating mixture of choline chloride and urea with a molar ratio of 1 : 2 at 80 °C until a homogeneous liquid was formed.<sup>S2</sup> [AEMIM][BF<sub>4</sub>] was prepared by reacting 1-methylimidazol with 2-bromoethylamine hydrobromide, and then metathesizing with potassium tetrafluoroborate.<sup>S3</sup> [BMIM][BF<sub>4</sub>] was prepared by reacting 1-methylimidazol with chlorobutane.<sup>S4</sup> All ionic liquids were dried under vacuum for at least 24 h at 70 °C prior to use. The water content in the ILs was below 100 ppm, as analyzed by Karl Fischer titration.

**UV-Vis measurement** The apparatus and experimental procedures were similar to those reported previously.<sup>S5</sup> It consisted mainly of a gas cylinder, a pressure gauge, an UV-Vis spectrometer and a temperature-controlled UV cell. UV-Vis spectrophotometer was produced by Beijing General Instrument Company (Model TU-1910, resolution: 0.1 nm). The high-pressure UV cell was composed mainly of a stainless steel body, two quartz windows, a stirrer, and a temperature controlling system. The optical path length and the inner volume of the cell were 1.32 cm and 1.74 cm<sup>3</sup>, respectively. In a typical experiment, known amount of solution of the probe in ethanol was transferred to a high-pressure UV cell. The cell was flushed with nitrogen to remove the ethanol. Then an appropriate amount of IL or IL/water mixture was transferred into the cell in a glove box. The temperature of the cell was kept at 25 ± 1 °C. The sample in the cell was stirred to promote equilibration. The measurement was done after complete equilibration, which was confirmed by the fact that the UV-vis absorption spectrum was not changed with time. All the spectra have been corrected by subtraction the absorption of the corresponding samples without indicators. In the presence of CO<sub>2</sub>, the procedures were similar as described above. The main difference was that CO<sub>2</sub> was charged to the cell. The equilibration time for the IL/CO<sub>2</sub> mixtures

was affected by the stirring speed and the viscosity of ILs. Generally, CH/urea could be equilibrated in half an hour while it takes about an hour for [AEMIM][BF<sub>4</sub>].

***H. measurement of ILs during the cycles of treatment with CO<sub>2</sub> and N<sub>2</sub>*** Upon bubbling CO<sub>2</sub> through the ILs in a test tube of 10 mL, appropriate amounts of ILs were taken at intervals and the corresponding *H*<sub>L</sub> values were determined. After the *H*<sub>L</sub> value remained constant, N<sub>2</sub> was introduced to recover the ILs. The gas flow rate was about 40 ml/min at ambient pressure. The operation was repeated three times for each ILs. 25 min and 45 min were enough for CH/urea to reach equilibration under bubbling CO<sub>2</sub> and N<sub>2</sub>, separately. For [AEMIM][BF<sub>4</sub>], the equilibration time was about 90 min and 180 min under CO<sub>2</sub> and N<sub>2</sub> treatment, separately.

## References

- [S1] H. X. Gao, B. X. Han, J. C. Li, T. Jiang, Z. M. Liu, W. Z. Wu, Y. H. Chang, J. C. Zhang, *Synth. Commun.* **2004**, *34*, 3083.
- [S2] A. P. Abbott, G. Capper, D. L. Davies, R. K. Rasheed, V. Tambyrajah, *Chem. Commun.* **2003**, 70.
- [S3] E. D. Bates, R. D. Mayton, I. Ntai, J. H. Davis, Jr., *J. Am. Chem. Soc.* **2002**, *124*, 926.
- [S4] J. Dupont, C. S. Consorti, P. A. Z. Suarez, R. F. Souza, *Org. Synth.* **1999**, *79*, 236.
- [S5] X. Y. Feng, J. L. Zhang, J. Chen, B. X. Han, D. Shen, *Chem. Eur. J.* **2006**, *12*, 2087.
